# Supplementary material
Source: publisher figshare collection journal article supplement (https://frontiersin.figshare.com/ndownloader/files/12912500)
Supplement: Supplementary file [file 12912500]

Figure S3

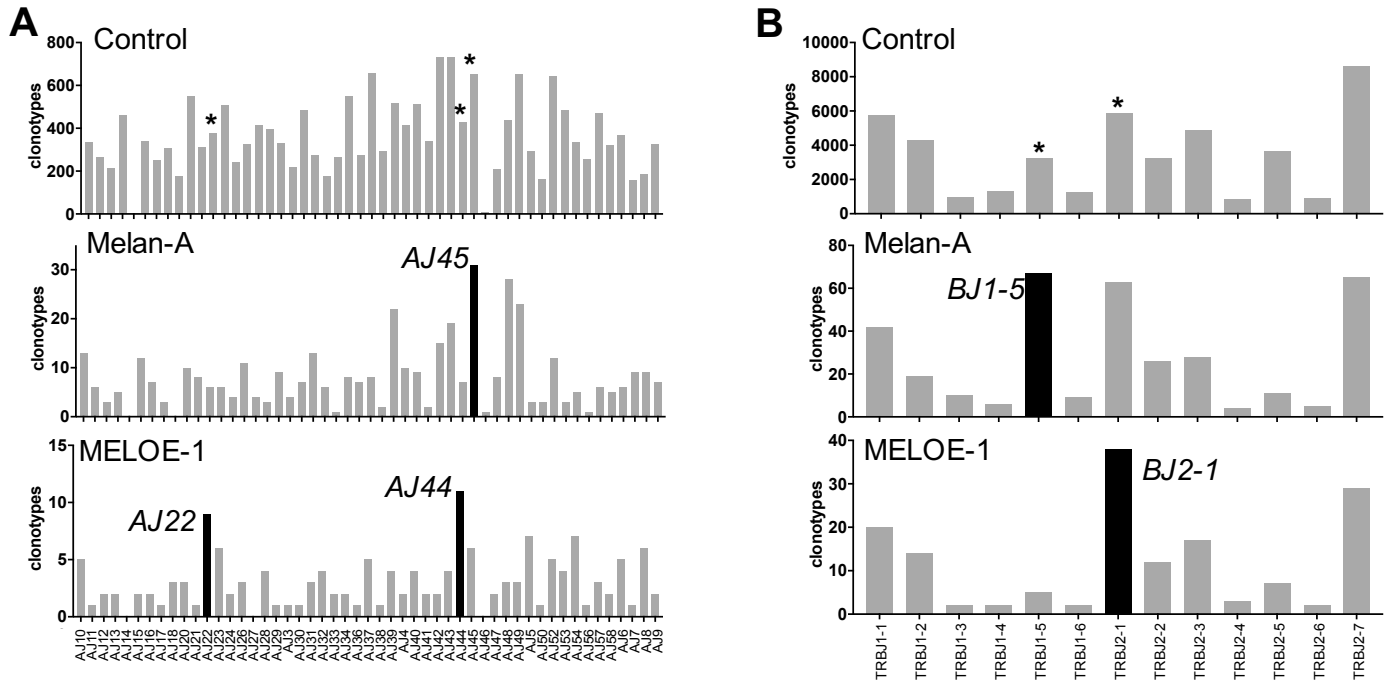

**Figure S3:** TRAJ and TRBJ usage of specific-T cell populations. Number of clonotypes using individual TRAJ (A) and TRBJ (B) chains in control (upper panels); Melan-A-specific T cell repertoire (sum of the clonotypes originating from the 6 populations) (middle panels); and MELOE-1-specific T cell repertoire (sum of the clonotypes originating from the 4 populations) (lower panels). Black histograms illustrate TRJ chains preferentially used in each T cell repertoire, and the same chains are marked with an asterisk in the control sample.
